# Supplementary material for: Network-based analysis of omics with multi-objective optimization
Source: Royal Society of Chemistry journal article supplement (doi:10.1039/c3mb70327d), 2013-09-30
Supplement: c3mb70327d_2.pdf [file c3mb70327d_2.pdf]

## Network-based integration of omics with multi-objective optimization.

Ettore Mosca and Luciano Milanese

Institute of Biomedical Technologies, CNR, Segrate (MI), Italy

### ADDITIONAL FILE 2. Gene sets containing basal markers or randomly selected genes.

| <b>BASAL GENE SET I<br/>(Proia, et al. 2011)*</b> | <b>BASAL CENTROID<br/>(Proia, et al. 2011)*</b> | <b>BASAL GENE SET II<br/>(Proia, et al. 2011)*</b> | <b>RANDOM I</b> | <b>RANDOM II</b> | <b>RANDOM III</b> |
|---------------------------------------------------|-------------------------------------------------|----------------------------------------------------|-----------------|------------------|-------------------|
| ACTA2                                             | CDH3                                            | ACTA2                                              | ADAMTSL4        | ABCE1            | BANK1             |
| IGFBP7                                            | CHI3L2                                          | BAP1                                               | ASAP3           | ADRB3            | C1QTNF1           |
| ITGB1                                             | CP                                              | C-MYB                                              | ASTE1           | ALDH3A1          | CTR9              |
| KRT14                                             | CRABP1                                          | CDH3                                               | ATF6B           | APOM             | DCAF7             |
| KRT17                                             | CSRP2                                           | EGFR                                               | BRD3            | CCR4             | FANCG             |
| MYLK                                              | CXCL1                                           | FGFR1                                              | CDC42BPA        | CEP55            | FCGR3B            |
| SLC39A6                                           | FABP7                                           | FN1                                                | CPD             | CSDA             | FGFR4             |
| SPARC                                             | FOXC1                                           | FOXC1                                              | DCTD            | CYP2C19          | HGSNAT            |
| TAGLN                                             | ID4                                             | ITGB1                                              | DRD2            | DRD1             | HNRNPL            |
| VIM                                               | KIT                                             | KRT14                                              | GTF3C1          | EXT1             | HTR1A             |
|                                                   | MMP7                                            | KRT17                                              | HDGF            | FGFR2            | LDHB              |
|                                                   | NFIB                                            | KRT5                                               | HTR5A           | GM2A             | MED20             |
|                                                   | PRNP                                            | LCN2                                               | LRR32           | ITPKB            | MOBP              |
|                                                   | SFRP1                                           | MMP9                                               | NCSTN           | OBSCN            | NRTN              |
|                                                   |                                                 | MYLK                                               | OTC             | PRY              | PRMT5             |
|                                                   |                                                 | NPY1R                                              | PCSK5           | RTDR1            | RAG2              |
|                                                   |                                                 | OXTR                                               | PHYHIP          | SMG9             | RBKS              |
|                                                   |                                                 | P63                                                | POLA2           | SNRPF            | RPL35             |
|                                                   |                                                 | PCDH8                                              | PSRC1           | SYF2             | SLC25A6           |
|                                                   |                                                 | PROM1                                              | SHCBP1          | SYT5             | SLC28A2           |
|                                                   |                                                 | THSD1                                              | SNAPC1          | TIMELESS         | TPD52             |
|                                                   |                                                 | THY1                                               | TBC1D8          | TNIP1            | TRIP12            |
|                                                   |                                                 | TIMP1                                              | TBCA            | ZNF259           | WNT16             |
|                                                   |                                                 | VIM                                                |                 |                  |                   |

\*Proia, et al. (2011, Cell Stem Cell, 8, 149-163)
